# Supplementary material
Source: PubMed Central journal article supplement (PMC6043361)
Supplement: NIHMS973248-supplement.pdf [file NIHMS973248-supplement.pdf]

**Table S1. Clinical characteristics of sepsis patients and healthy control individuals, Related to Figure 1 (Zeng et al., 2017)**

|                                                    | Control group<br>(n=16) | Sepsis group<br>(n=16) |
|----------------------------------------------------|-------------------------|------------------------|
| Age, mean (SD)                                     | 38.9 (18.9)             | 48.5 (14.3)            |
| Gender N (%)                                       |                         |                        |
| Male                                               | 10 (62.5%)              | 12 (75%)               |
| Female                                             | 6 (37.5%)               | 4 (25%)                |
| Simplified Acute Physiology Score II,<br>mean (SD) | NA                      | 5.8 (2.4)              |
| In-hospital mortality, N (%)                       |                         |                        |
| Yes                                                | NA                      | 4 (25)                 |
| No                                                 | NA                      | 12 (75)                |
| Length of stay, d, median (range)                  | NA                      | 24.5 (3, 49)           |

NA, not applicable

**Table S2. Primers used for qPCR, related to STAR Methods**

| <b>REAGENT or RESOURCE</b>                                    | <b>SOURCE</b> | <b>IDENTIFIER</b> |
|---------------------------------------------------------------|---------------|-------------------|
| Human <i>Gpx1</i> primer_F: 5'-<br>GTGCTCGGCTTCCCGTGCAAC-3'   | This paper    | N/A               |
| Human <i>Gpx1</i> primer_R: 5'-<br>CTCGAAGAGCATGAAGTTGGGC-3'  | This paper    | N/A               |
| Mouse <i>Gpx1</i> primer_F: 5'-<br>CGCTCTTTACCTTCCTGCGGAA-3'  | This paper    | N/A               |
| Mouse <i>Gpx1</i> primer_R: 5'-<br>AGTTCCAGGCAATGTCGTTGCG-3'  | This paper    | N/A               |
| Human <i>Gpx2</i> primer_F: 5'-<br>TGCAACCAATTTGGACATCAG -3'  | This paper    | N/A               |
| Human <i>Gpx2</i> primer_R: 5'-<br>AGACAGGATGCTCGTTCTGC -3'   | This paper    | N/A               |
| Mouse <i>Gpx2</i> primer_F: 5'-<br>ACCGATCCCAAGCTCATCAT -3'   | This paper    | N/A               |
| Mouse <i>Gpx2</i> primer_R: 5'-<br>CAAAGTTCCAGGACACGTCTGA -3' | This paper    | N/A               |
| Human <i>Gpx3</i> primer_F: 5'-<br>TACGGAGCCCTCACCATTGATG-3'  | This paper    | N/A               |
| Human <i>Gpx3</i> primer_R: 5'-<br>CAGACCGAATGGTGCAAGCTCT-3'  | This paper    | N/A               |
| Mouse <i>Gpx3</i> primer_F: 5'-<br>ATCCTGCCTTCTGTCCCTGCTC-3'  | This paper    | N/A               |
| Mouse <i>Gpx3</i> primer_R: 5'-<br>TGGTGAGGGCTCCATACTCGTA-3'  | This paper    | N/A               |
| Human <i>Gpx4</i> primer_F: 5'-<br>ACAAGAACGGCTGCGTGGTGAA-3'  | This paper    | N/A               |
| Human <i>Gpx4</i> primer_R: 5'-<br>GCCACACACTTGTGGAGCTAGA-3'  | This paper    | N/A               |

|                                                                 |            |     |
|-----------------------------------------------------------------|------------|-----|
| Mouse <i>Gpx4</i> primer_F: 5'-<br>CCTCTGCTGCAAGAGCCTCCC-3'     | This paper | N/A |
| Mouse <i>Gpx4</i> primer_R: 5'-<br>CTTATCCAGGCAGACCATGTGC-3'    | This paper | N/A |
| Human <i>Gpx5</i> primer_F: 5'-<br>GGCAAGCACATCCTCTTCGTCA-3'    | This paper | N/A |
| Human <i>Gpx5</i> primers_R: 5'-<br>GTTATCTCCTGGTTCTTGCTTTCC-3' | This paper | N/A |
| Mouse <i>Gpx5</i> primer_F: 5'-<br>TGTGGCTACCTATTGCGGTCTG-3'    | This paper | N/A |
| Mouse <i>Gpx5</i> primer_R: 5'-<br>TTGTCTCCTGGTTCTTGCTTTCC-3'   | This paper | N/A |
| Human <i>Gpx6</i> primer_F: 5'-<br>ATGAGTACGGAGCCAACACC-3'      | This paper | N/A |
| Human <i>Gpx6</i> primer_R: 5'-<br>CATGGAAAGCCCAAACACT-3'       | This paper | N/A |
| Mouse <i>Gpx6</i> primer_F: 5'-<br>GGAGCCAACACCATAGATGGTG -3'   | This paper | N/A |
| Mouse <i>Gpx6</i> primer_R: 5'-<br>CGTTGAATGGCTTCAGCTCCTC-3'    | This paper | N/A |
| Human <i>Gpx7</i> primer_F: 5'-<br>CGACTTCAAGGCGGTCAACATC -3'   | This paper | N/A |
| Human <i>Gpx7</i> primer_R: 5'-<br>TCGGTAGTGCTGGTCTGTGAAG -3'   | This paper | N/A |
| Mouse <i>Gpx7</i> primer_F: 5'-<br>CGACTTCAAGGCGGTCAACATC -3'   | This paper | N/A |
| Mouse <i>Gpx7</i> primer_R: 5'-<br>AAGGCTCGGTAGTTCTGGTCTG -3'   | This paper | N/A |
| Human <i>Gpx8</i> primer_F: 5'-<br>CTAGGATCTGAAGGAGAACCTGC -3'  | This paper | N/A |

|                                                                                 |            |     |
|---------------------------------------------------------------------------------|------------|-----|
| Human <i>Gpx8</i> primer_R: 5'-<br>GCCTGATGACTTCAATGGGCTC -3'                   | This paper | N/A |
| Mouse <i>Gpx8</i> primer_F: 5'-<br>TGCGAGACAGAACTACGGAGTC -3'                   | This paper | N/A |
| Mouse <i>Gpx8</i> primer_R: 5'-<br>TTCCACCTTGGCTCCTTCTTGG -3'                   | This paper | N/A |
| Mouse <i>18S RNA</i> primer_F: 5'-<br>GCAATTATTCCCCATGAACG-3'                   | This paper | N/A |
| Mouse <i>18S RNA</i> primer_R: 5'-<br>GGCCTCACTAAACCATCCAA-3'                   | This paper | N/A |
| Human <i>18S RNA</i> primer_F: 5'-<br>CTACCACATCCAAGGAAGCA-3'                   | This paper | N/A |
| Human <i>18S RNA</i> primer_R: 5'-<br>TTTTTCGTCACTACCTCCCCG-3'                  | This paper | N/A |
| Mouse <i>IL-1<math>\beta</math></i> primer_F: 5'-<br>TGGACCTTCCAGGATGAGGACA-3'  | This paper | N/A |
| Mouse <i>IL-1<math>\beta</math></i> primer_R: 5'-<br>GTTTCATCTCGGAGCCTGTAGTG-3' | This paper | N/A |
| Mouse <i>caspase-11</i> primer_F: 5'-<br>GTGGTGAAAGAGGAGCTTACAGC-3'             | This paper | N/A |
| Mouse <i>caspase-11</i> primer_R: 5'-<br>GCACCAGGAATGTGCTGTCTGA-3'              | This paper | N/A |
